# Supplementary material
Source: PubMed Central journal article supplement (PMC3357210)
Supplement: NIHMS319313-supplement-Figure_I.pdf [file NIHMS319313-supplement-Figure_I.pdf]

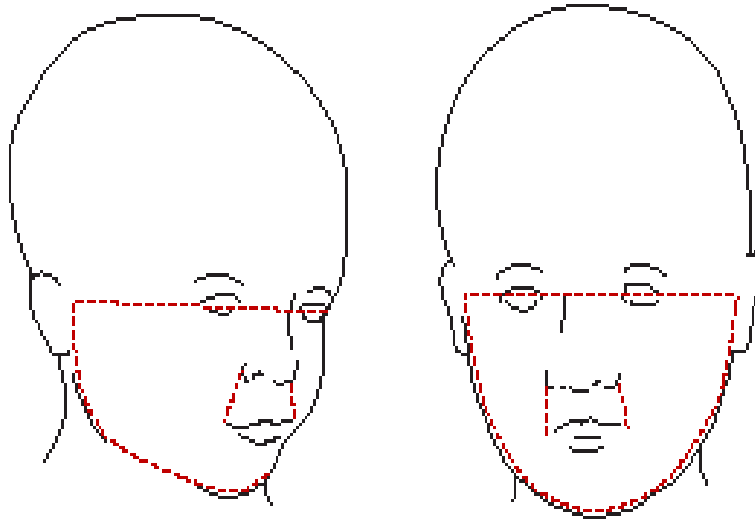

1A

1B

**SUPPLEMENTAL FIGURE 1: SCHEMATIC FRONTOLATERAL (1A) AND  
FRONTAL (1B) VIEWS SHOWING NASOLABIAL FOLDS AND BOUNDARIES  
ENCLOSING THE LOCATIONS OF SUPERFICIAL FACIAL TUMORS**
