# Supplementary material
Source: PubMed Central journal article supplement (PMC3357210)
Supplement: NIHMS319313-supplement-Figure_II.pdf [file NIHMS319313-supplement-Figure_II.pdf]

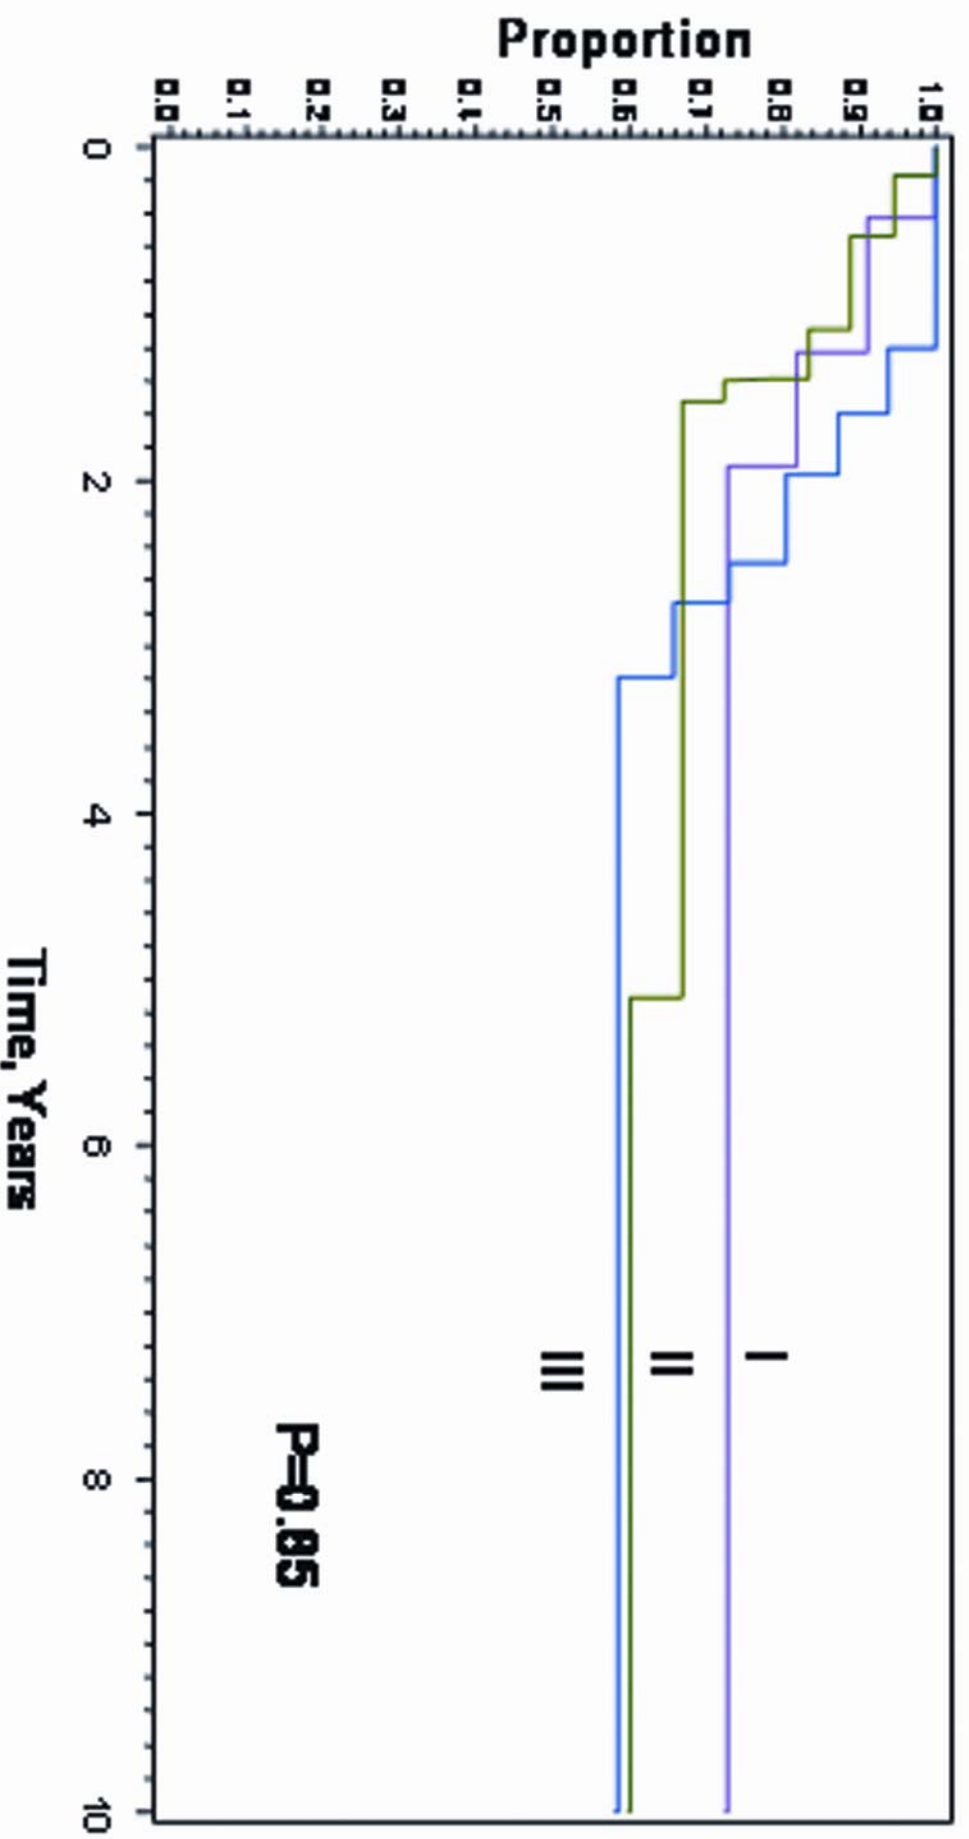

## SUPPLEMENTAL FIGURE 2:

Event-Free Survival by Group,

Superficial Facial RMS, IRS 1984-97

magenta = I; blue = II; green = III
