# Supplementary material
Source: PubMed Central journal article supplement (PMC3357210)
Supplement: NIHMS319313-supplement-Table_I.pdf [file NIHMS319313-supplement-Table_I.pdf]

**Supplemental Table I: Gender and Age of 47 Patients With Superficial Facial Rhabdomyosarcoma**

| <b>Gender</b> | <b>Age&lt;1 Year</b> | <b>Age 1-9 Years</b> | <b>Age 9+ Years</b> | <b>P-Value</b> |
|---------------|----------------------|----------------------|---------------------|----------------|
|               |                      |                      |                     |                |
| <b>Male</b>   | 5 (16%)              | 23 (72%)             | 4 (13%)             | 0.69           |
| <b>Female</b> | 1 (7%)               | 12 (80%)             | 2 (13%)             |                |
