# Supplementary material
Source: PubMed Central journal article supplement (PMC3357210)
Supplement: NIHMS319313-supplement-Table_II.pdf [file NIHMS319313-supplement-Table_II.pdf]

**SUPPLEMENTAL TABLE II: GENDER, PATHOLOGIC SUBTYPE, AND REGIONAL LYMPH-NODAL INVOLVEMENT**

| <b>Category</b>          | <b>No. with + Nodes/Total*</b> | <b>P-Value</b> |
|--------------------------|--------------------------------|----------------|
| <b>Gender</b>            |                                |                |
| <b>Male</b>              | 10/32 (31%)                    | 1.00           |
| <b>Female</b>            | 4/15 (27%)                     |                |
|                          |                                |                |
| <b>Histology</b>         |                                |                |
| <b>Embryonal RMS</b>     | 4/22 (18%)                     |                |
| <b>Alveolar RMS</b>      | 9/23 (39%)                     | 0.19           |
| <b>RMS Not Specified</b> | 1/2 (50%)                      |                |

\* + = Tumor-involved lymph nodes, RMS = Rhabdomyosarcoma
